# Supplementary material
Source: PubMed Central journal article supplement (PMC5871874)

# Supplementary Figure 2

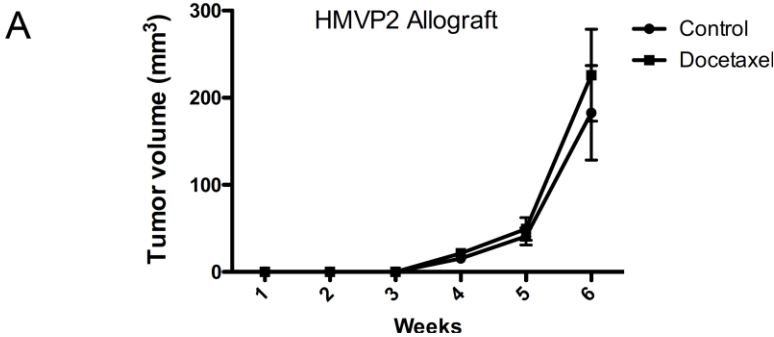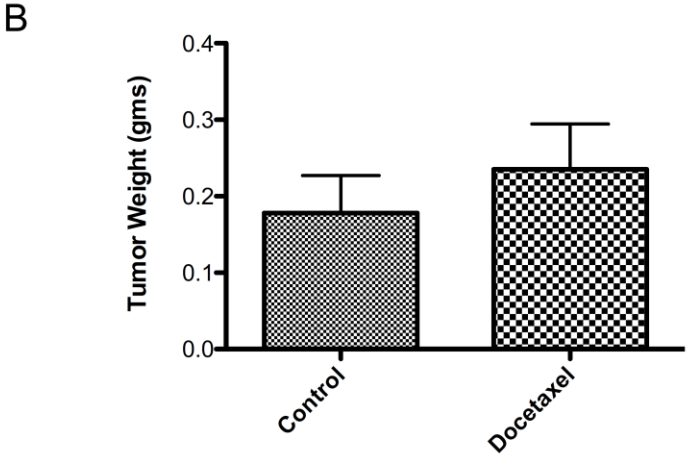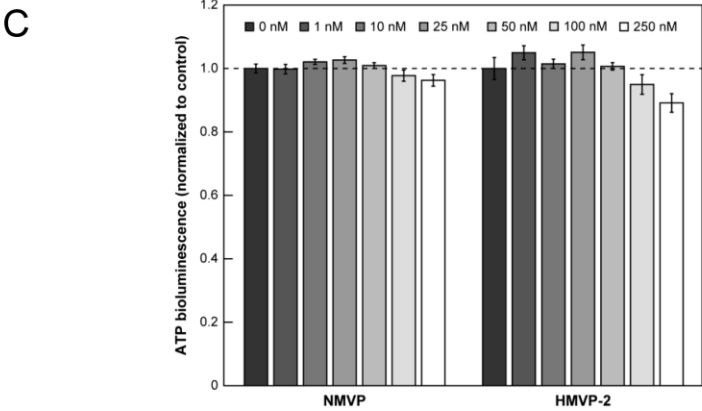

Supplement: 41698_2017_24_MOESM4_ESM.pdf [file 41698_2017_24_MOESM4_ESM.pdf]
