# Supplementary material
Source: PubMed Central journal article supplement (PMC5871874)
Supplement: 41698_2017_24_MOESM5_ESM.pdf [file 41698_2017_24_MOESM5_ESM.pdf]

# Supplementary Figure 3

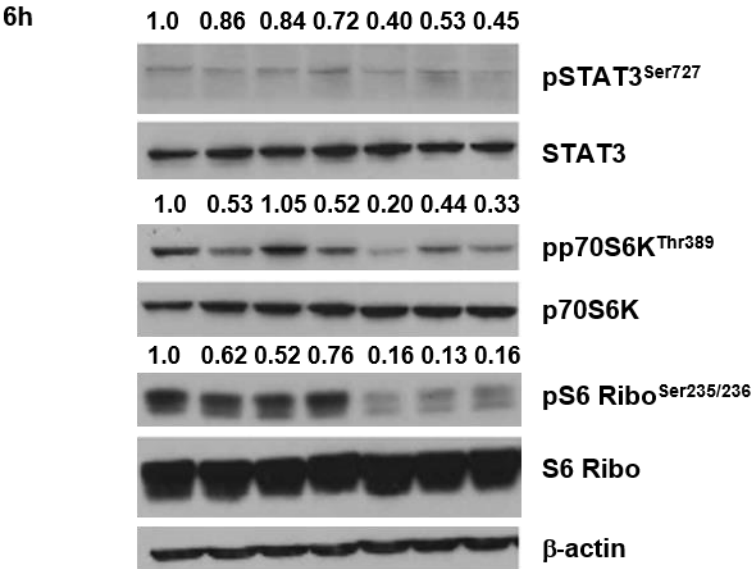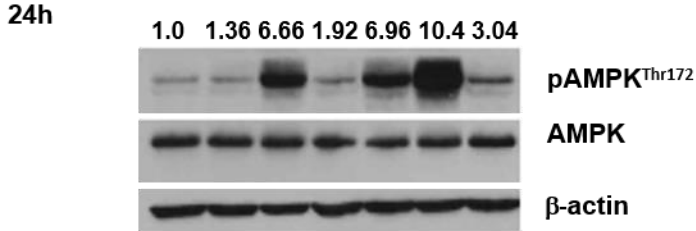

|                   |   |    |    |    |    |    |    |
|-------------------|---|----|----|----|----|----|----|
| Curcumin (μM)     | - | 20 | -  | -  | 20 | -  | 20 |
| Ursolic acid (μM) | - | -  | 20 | -  | 20 | 20 | -  |
| Resveratrol (μM)  | - | -  | -  | 20 | -  | 20 | 20 |
