# Supplementary material
Source: PubMed Central journal article supplement (PMC5871874)

|                                |   |    |    |    |    |    |    |    |    |   |    |    |    |    |    |    |
|--------------------------------|---|----|----|----|----|----|----|----|----|---|----|----|----|----|----|----|
| Curcumin ( $\mu\text{M}$ )     | - | -  | -  | -  | -  | -  | -  | -  | -  | - | 10 | 20 | 10 | 20 | 10 | 20 |
| Ursolic acid ( $\mu\text{M}$ ) | - | 10 | 20 | -  | -  | 10 | 10 | 20 | 20 | - | -  | 10 | 10 | 20 | 20 | 20 |
| Resveratrol ( $\mu\text{M}$ )  | - | -  | -  | 10 | 20 | 10 | 20 | 10 | 20 | - | -  | -  | -  | -  | -  | -  |

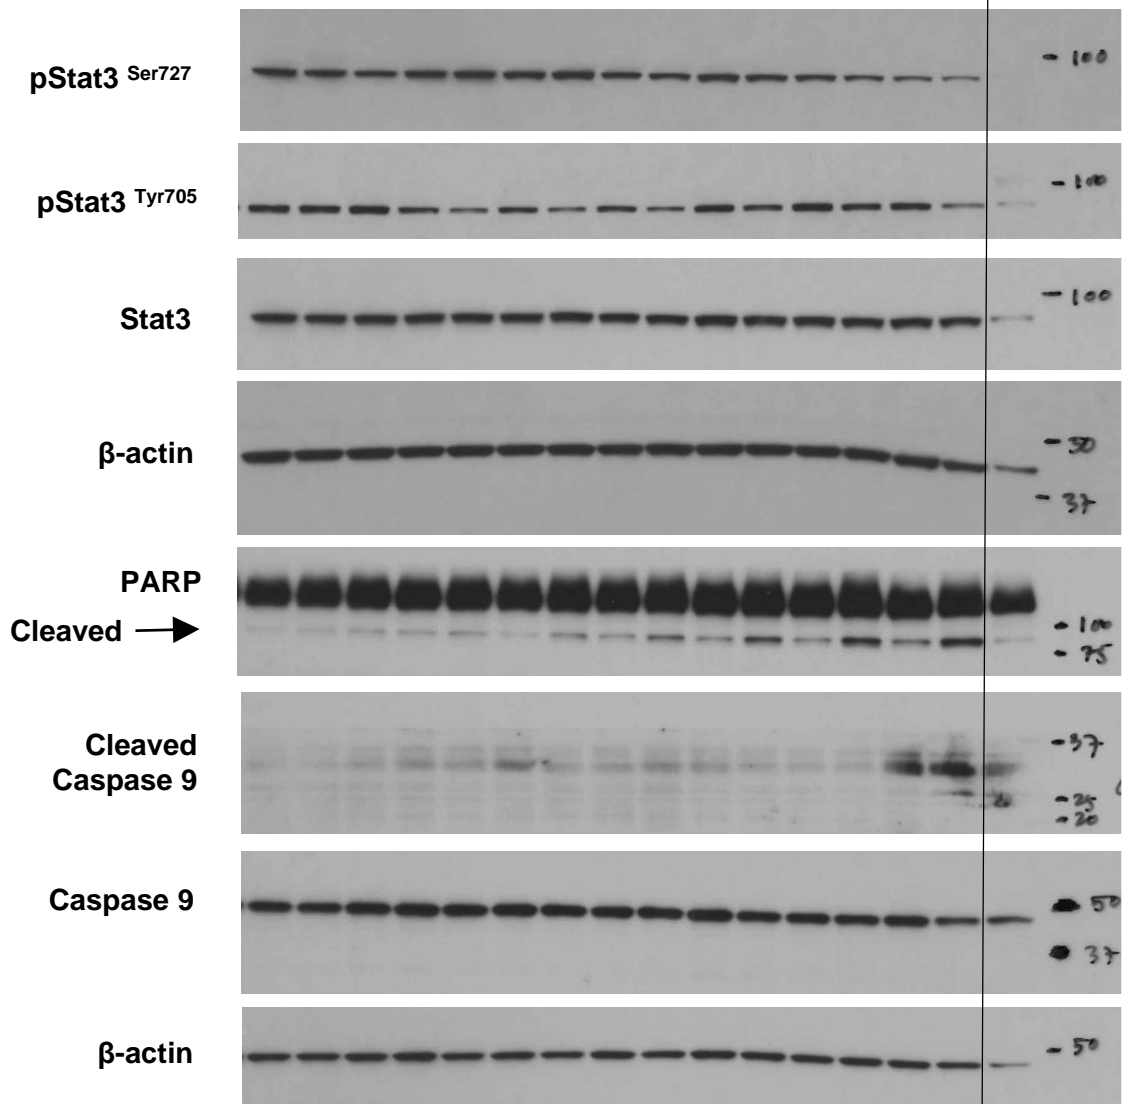

Supplement: 41698_2017_24_MOESM7_ESM.pdf [file 41698_2017_24_MOESM7_ESM.pdf]
